# Supplementary material for: Advancing nonlinear optics: discovery and characterization of new non-centrosymmetric phenazine-based halides
Source: Royal Society of Chemistry journal article supplement (doi:10.1039/d4dt01096e), 2024-01-01
Supplement: d4dt01096e1.pdf [file d4dt01096e1.pdf]

## Electronic Supplementary Material

---

# Advancing Nonlinear Optics: Discovery and Characterization of New Non-Centrosymmetric Phenazine-Based Halides

Yibo Cui,<sup>a</sup> Jindong Cao,<sup>a</sup> Jiawei Lin,<sup>b</sup> Chunxiao Li,<sup>c</sup> Jiyong Yao,<sup>c</sup> Kunjie Liu,<sup>a</sup> An Hou,<sup>a</sup> Zhongnan Guo,<sup>b</sup> Jing Zhao,<sup>\*a</sup> Quanlin Liu<sup>\*a</sup>

<sup>a</sup> The Beijing Municipal Key Laboratory of New Energy Materials and Technologies, School of Materials Science and Engineering, University of Science and Technology Beijing, Beijing 100083, P. R. China

Jing Zhao, E-mail: jingzhao@ustb.edu.cn. Quanlin Liu, E-mail: qlliu@ustb.edu.cn.

<sup>b</sup> The Beijing Municipal Key Laboratory of New Energy Materials and Technologies, School of Materials Sciences and Engineering and Chemistry and Biological Engineering, University of Science and Technology Beijing, Beijing 100083, China.

<sup>c</sup> Center for Crystal Research and Development, Key Laboratory of Functional Crystals and Laser Technology, Technical Institute of Physics and Chemistry, Chinese Academy of Sciences, Beijing 100190, China.

# SUPPORTING INFORMATION

## CONTENTS

### 1. Figures

**Figure S1** Photographs of  $(C_{12}H_9N_2)PbCl_3$  (a),  $(C_{12}H_9N_2)SbCl_4$  (b), and  $(C_{12}H_9N_2)_2InBr_4 \cdot Br$  (c). Fluorescence photographs of  $(C_{12}H_9N_2)PbCl_3$  (d),  $(C_{12}H_9N_2)SbCl_4$  (e), and  $(C_{12}H_9N_2)_2InBr_4 \cdot Br$ . **3**

**Figure S2** Nonlinear optical responses and intensity ratios to KDP for  $(C_{12}H_9N_2)PbCl_3$ ,  $(C_{12}H_9N_2)SbCl_4$ , and  $(C_{12}H_9N_2)_2InBr_4 \cdot Br$  at different particles. **3**

**Figure S3** Spatial H-bond distributions for  $(C_{12}H_9N_2)PbCl_3$  (a),  $(C_{12}H_9N_2)SbCl_4$  (b),  $(C_{12}H_9N_2)_2InBr_4 \cdot Br$  (c), and their specific connections in two environments (d, e and f). **4**

**Figure S4** (a) PXRD patterns of the three compounds. (b) EDS mapping demonstrates the homogenous distribution of elements in the examined compounds. **4**

**Figure S5** PXRD comparison of  $(C_{12}H_9N_2)PbCl_3$  (a),  $(C_{12}H_9N_2)SbCl_4$  (b), and  $(C_{12}H_9N_2)_2InBr_4 \cdot Br$  (c) before and after three months. **5**

**Figure S6** The UV-Visible absorption spectra and experimental band gaps are provided for  $(C_{12}H_9N_2)PbCl_3$  (a),  $(C_{12}H_9N_2)SbCl_4$  (b), and  $(C_{12}H_9N_2)_2InBr_4 \cdot Br$  (c). UV-Vis absorption spectrum of  $C_{12}H_8N_2$ , with photograph inset (d), direct optical bandgap of  $C_{12}H_8N_2$  (e), indirect optical bandgap of  $C_{12}H_8N_2$  (f). Additionally, the theoretically calculated band gap diagrams are shown for  $(C_{12}H_9N_2)PbCl_3$  (g),  $(C_{12}H_9N_2)SbCl_4$  (h), and  $(C_{12}H_9N_2)_2InBr_4 \cdot Br$  (i). **5**

**Figure S7** The PDOS and TDOS diagrams of  $(C_{12}H_9N_2)PbCl_3$  (a),  $(C_{12}H_9N_2)SbCl_4$  (b), and  $(C_{12}H_9N_2)_2InBr_4 \cdot Br$  (c). **6**

**Figure S8** UV-Vis absorption spectra of  $(C_{12}H_9N_2)_2InBr_4 \cdot Br$  at room temperature and 160 °C (a), and their corresponding bandgaps (b). **6**

**Figure S9** The emission spectrum of the organic compound  $C_{12}H_8N_2$  at various excitation wavelengths. **6**

### 2. Tables

**Table S1** Atomic coordinates ( $\times 10^4$ ) and equivalent isotropic displacement parameters ( $\text{\AA}^2 \times 10^3$ ) for  $(C_{12}H_9N_2)PbCl_3$  at 150.0 K with estimated standard deviations in parentheses. **7**

**Table S2** Atomic coordinates ( $\times 10^4$ ) and equivalent isotropic displacement parameters ( $\text{\AA}^2 \times 10^3$ ) for  $(C_{12}H_9N_2)SbCl_4$  at 293(2) K with estimated standard deviations in parentheses. **8**

**Table S3** Atomic coordinates ( $\times 10^4$ ) and equivalent isotropic displacement parameters ( $\text{\AA}^2 \times 10^3$ ) for  $(C_{12}H_9N_2)_2InBr_4 \cdot Br$  at 150.0 K with estimated standard deviations in parentheses. **9**

**Table S4** Under 2090 nm laser irradiation, the SHG intensity of  $(C_{12}H_9N_2)PbCl_3$ ,  $(C_{12}H_9N_2)SbCl_4$ , and  $(C_{12}H_9N_2)_2InBr_4 \cdot Br$  at different particle sizes was compared with that of  $AgGaS_2$ . **11**

**Table S5** Olex2 crystal structure refinement parameters of  $(C_{12}H_9N_2)PbCl_3$  compared in two space groups,  $P1$  and  $P$ . **11**

**Table S6** Olex2 crystal structure refinement parameters of  $(C_{12}H_9N_2)SbCl_4$  compared in two space groups,  $P2_1/c$  and  $P2_1$ . **11**

## 1. Figures

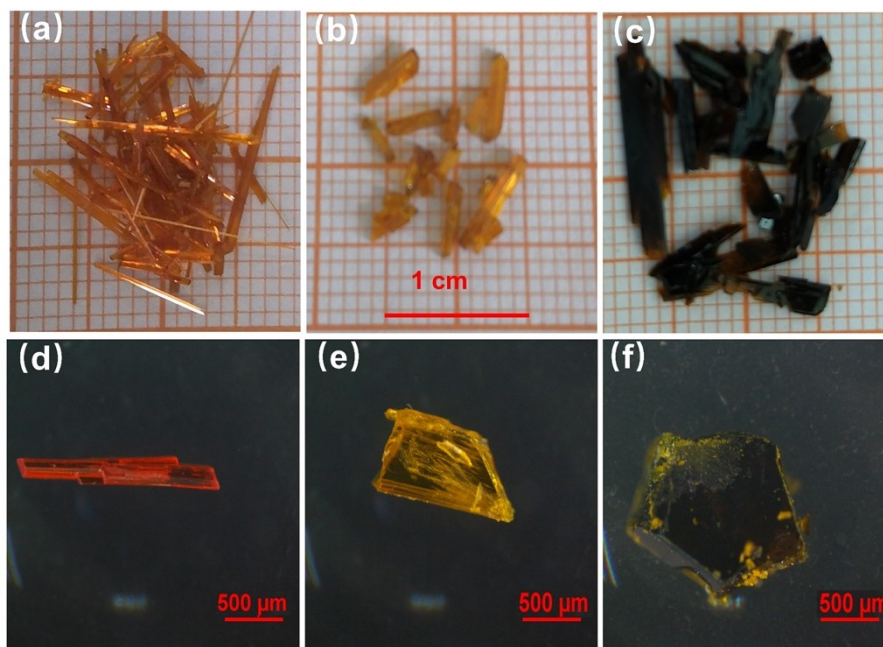

**Figure S1.** Photographs of  $(C_{12}H_9N_2)PbCl_3$  (a),  $(C_{12}H_9N_2)SbCl_4$  (b), and  $(C_{12}H_9N_2)_2InBr_4 \cdot Br$  (c). Fluorescence photographs of  $(C_{12}H_9N_2)PbCl_3$  (d),  $(C_{12}H_9N_2)SbCl_4$  (e), and  $(C_{12}H_9N_2)_2InBr_4 \cdot Br$  (f).

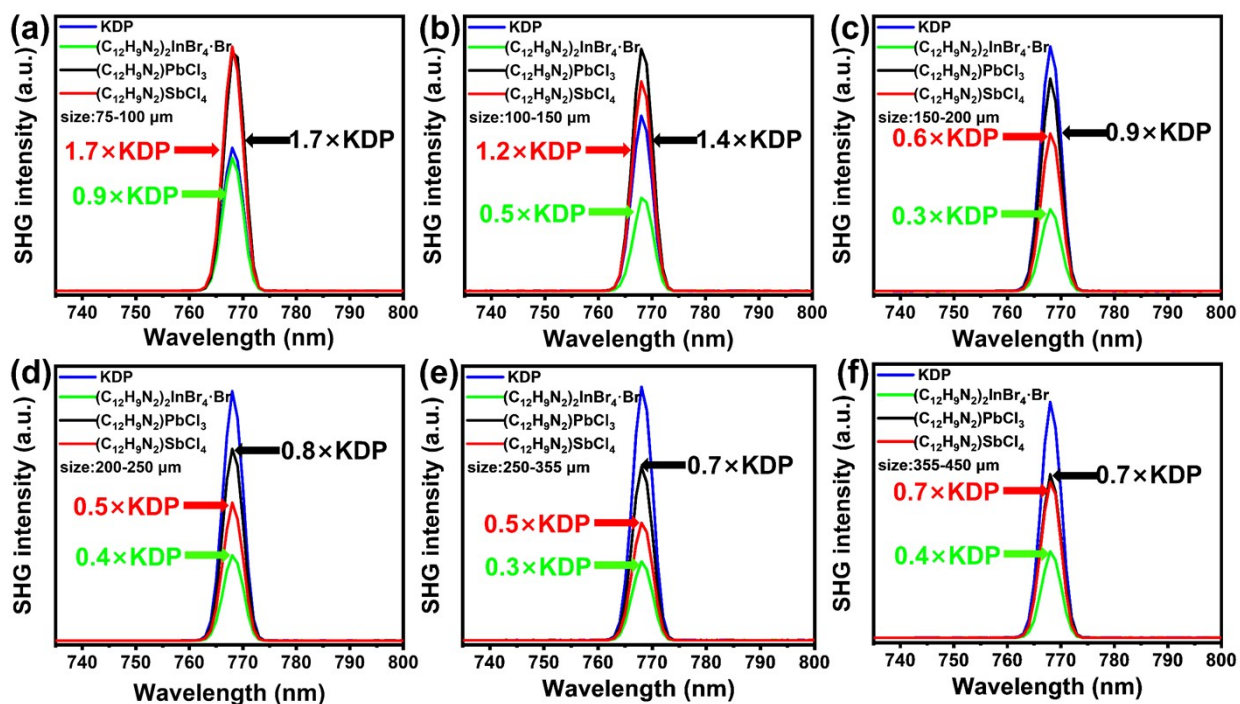

## SUPPORTING INFORMATION

**Figure S2.** Nonlinear optical responses and intensity ratios to KDP for  $(C_{12}H_9N_2)PbCl_3$ ,  $(C_{12}H_9N_2)SbCl_4$ , and  $(C_{12}H_9N_2)_2InBr_4 \cdot Br$  at different particles.

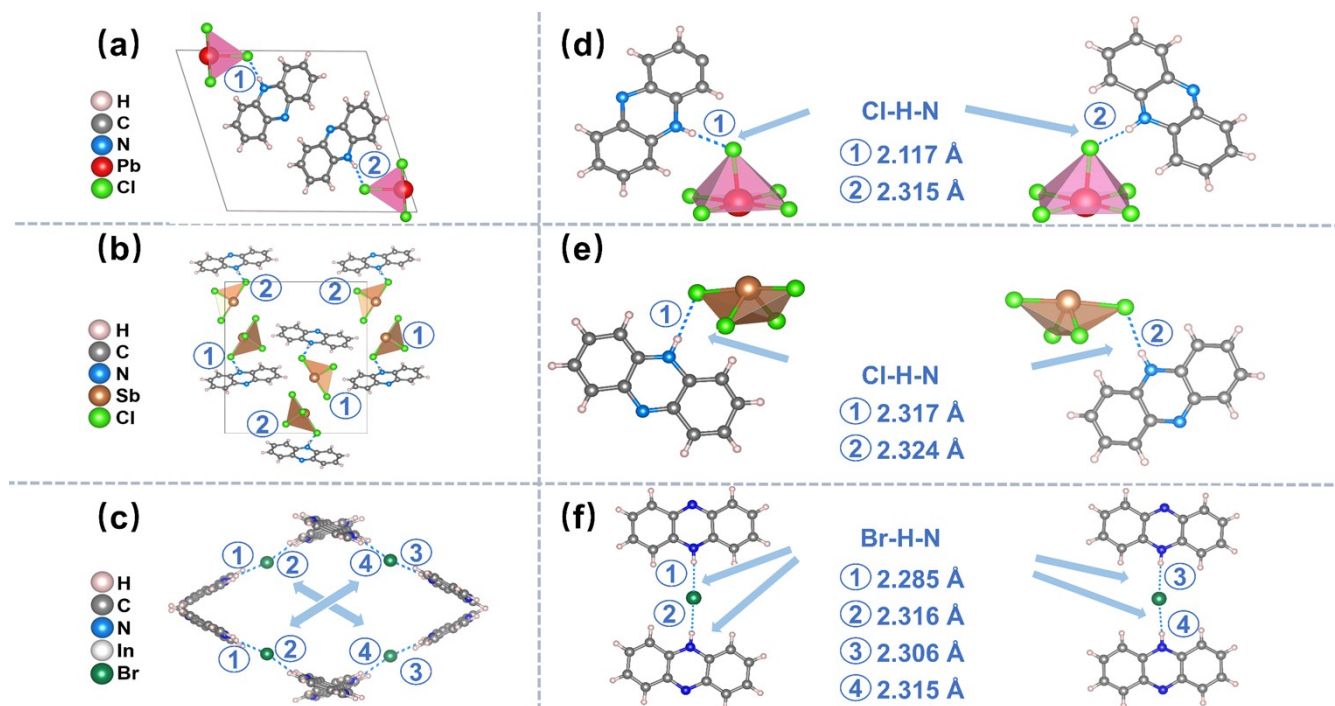

**Figure S3.** Spatial H-bond distributions for  $(C_{12}H_9N_2)PbCl_3$  (a),  $(C_{12}H_9N_2)SbCl_4$  (b),  $(C_{12}H_9N_2)_2InBr_4 \cdot Br$  (c), and their specific connections in two environments (d, e and f).

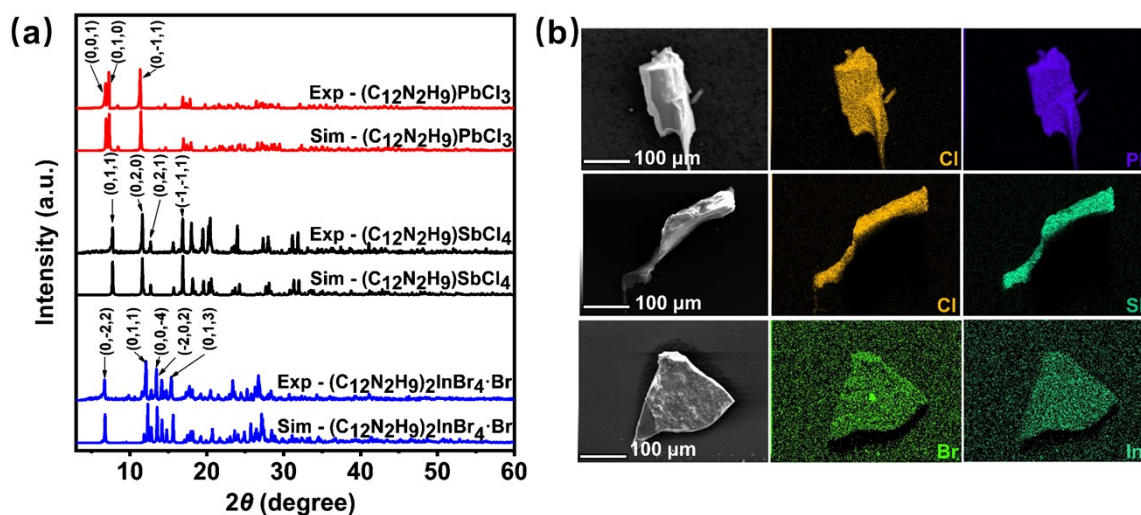

**Figure S4.** (a) PXRD patterns of the three compounds. (b) EDS mapping demonstrates the homogenous distribution of elements in the examined compounds.

## SUPPORTING INFORMATION

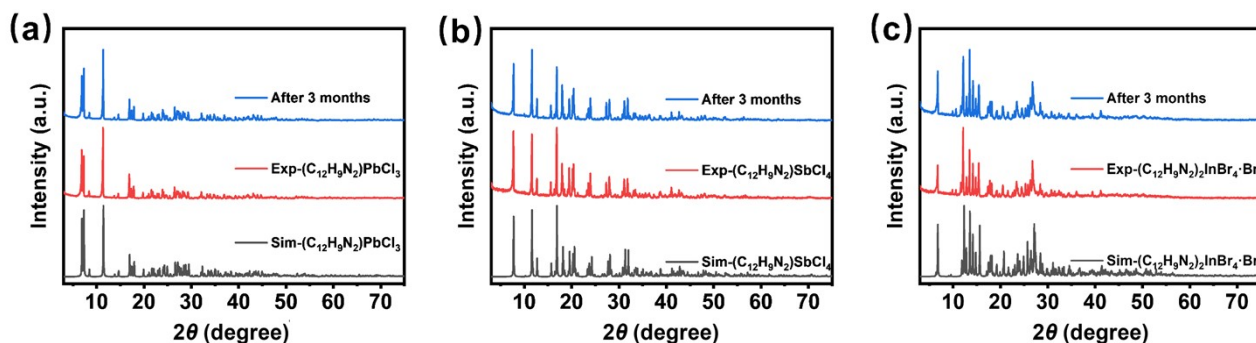

**Figure S5.** PXRD comparison of  $(C_{12}H_9N_2)PbCl_3$  (a),  $(C_{12}H_9N_2)SbCl_4$  (b), and  $(C_{12}H_9N_2)_2InBr_4 \cdot Br$  (c) before and after three months.

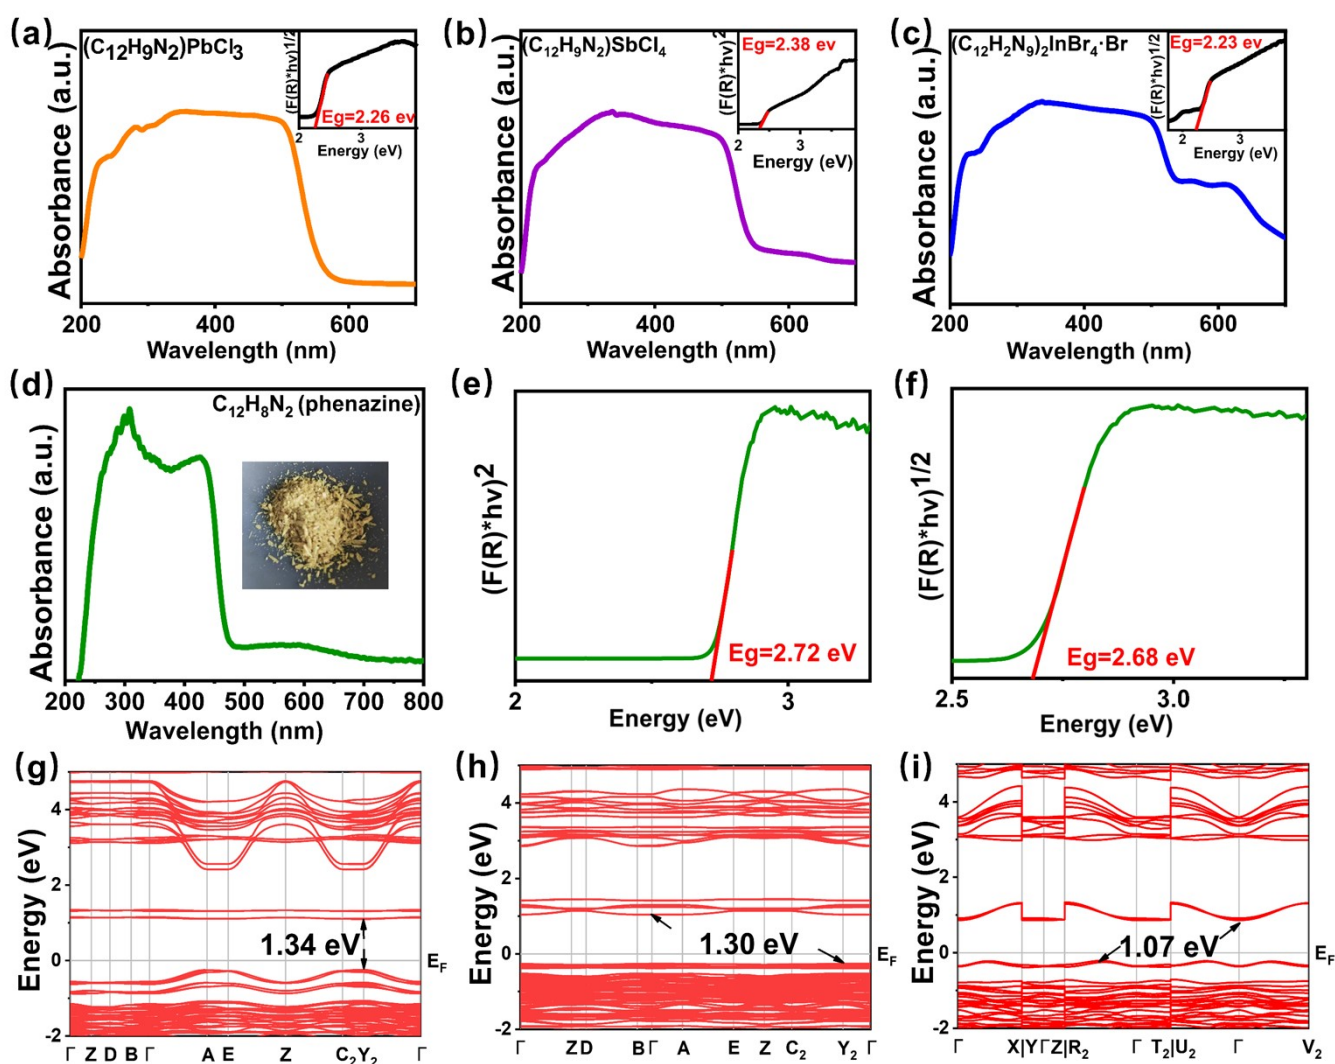

**Figure S6.** The UV-Visible absorption spectra and experimental band gaps are provided for  $(C_{12}H_9N_2)PbCl_3$  (a),  $(C_{12}H_9N_2)SbCl_4$  (b), and  $(C_{12}H_9N_2)_2InBr_4 \cdot Br$  (c). UV-Vis absorption spectrum of  $C_{12}H_8N_2$ , with photograph inset (d), direct optical bandgap of  $C_{12}H_8N_2$  (e), indirect optical bandgap of  $C_{12}H_8N_2$  (f). Additionally, the theoretically calculated band gap diagrams are shown for  $(C_{12}H_9N_2)PbCl_3$  (g),  $(C_{12}H_9N_2)SbCl_4$  (h), and  $(C_{12}H_9N_2)_2InBr_4 \cdot Br$  (i).

## SUPPORTING INFORMATION

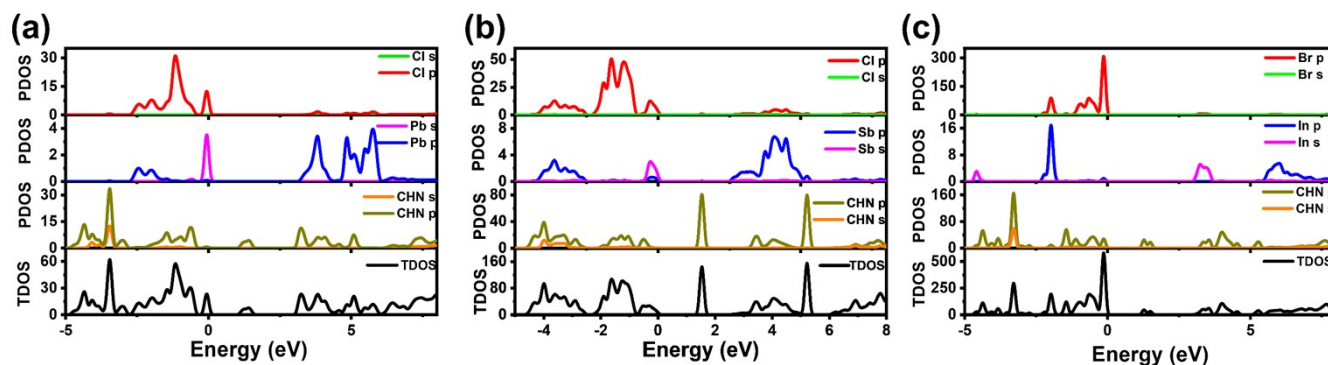

**Figure S7.** The PDOS and TDOS diagrams of  $(C_{12}H_9N_2)PbCl_3$  (a),  $(C_{12}H_9N_2)SbCl_4$  (b), and  $(C_{12}H_9N_2)_2InBr_4 \cdot Br$  (c).

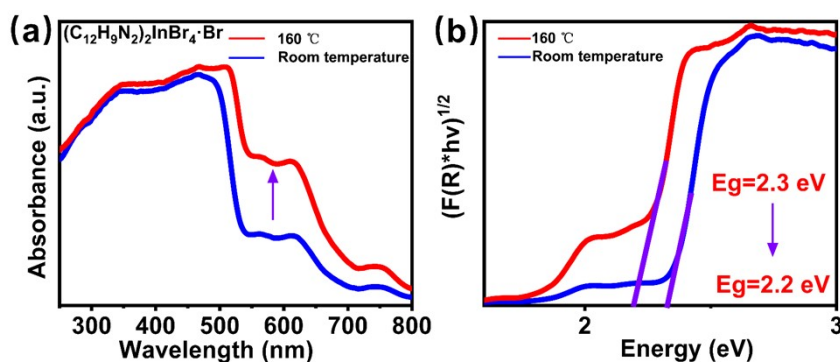

**Figure S8.** UV-Vis absorption spectra of  $(C_{12}H_9N_2)_2InBr_4 \cdot Br$  at room temperature and 160 °C (a), and their corresponding bandgaps (b).

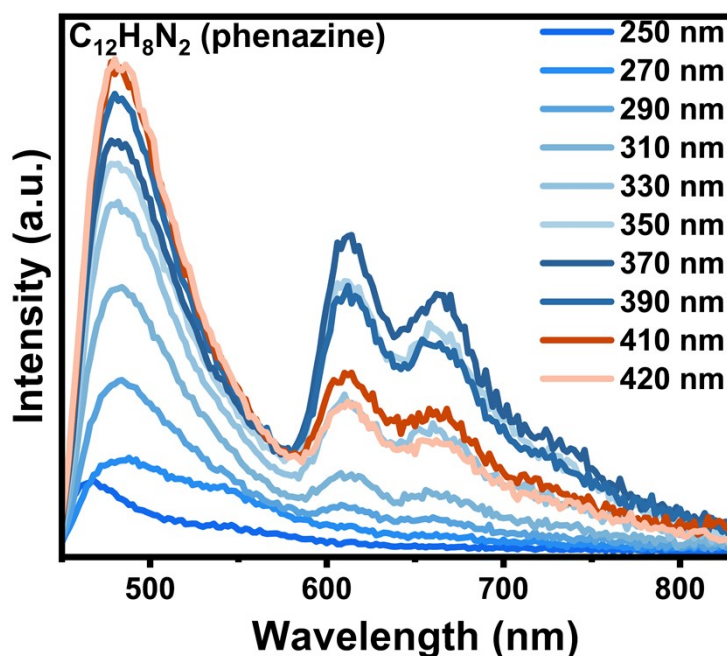

**Figure S9.** The emission spectrum of the organic compound  $C_{12}H_8N_2$  at various excitation wavelengths.

## SUPPORTING INFORMATION

### 2. Table

**Table S1.** Atomic coordinates ( $\times 10^4$ ) and equivalent isotropic displacement parameters ( $\text{\AA}^2 \times 10^3$ ) for  $(\text{C}_{12}\text{H}_9\text{N}_2)\text{PbCl}_3$  at 150.0 K with estimated standard deviations in parentheses.

| Label | x          | y         | z          | Occupancy | $U_{\text{eq}}^*$ |
|-------|------------|-----------|------------|-----------|-------------------|
| Pb(1) | -10011(1)  | -8601(1)  | -9655(1)   | 1         | 29(1)             |
| Pb(2) | -13833(1)  | -10343(1) | -11643(1)  | 1         | 28(1)             |
| Cl(2) | -5640(20)  | -7003(7)  | -10018(7)  | 1         | 53(2)             |
| Cl(5) | -9130(20)  | -8620(7)  | -11989(7)  | 1         | 56(2)             |
| N(2)  | -5960(60)  | -4150(20) | -14620(20) | 1         | 35(5)             |
| C(7)  | -8720(60)  | -5390(20) | -13090(20) | 1         | 41(6)             |
| N(1)  | -9610(40)  | -2332(17) | -14005(17) | 1         | 28(4)             |
| C(3)  | -9830(60)  | -3330(20) | -13320(20) | 1         | 28(5)             |
| C(2)  | -7150(50)  | -2130(20) | -14957(19) | 1         | 33(6)             |
| C(4)  | -11910(60) | -3560(20) | -12534(18) | 1         | 30(6)             |
| C(5)  | -12210(60) | -4610(20) | -11951(15) | 1         | 37(7)             |
| C(12) | -5210(60)  | -922(18)  | -16460(20) | 1         | 25(4)             |
| C(1)  | -7220(50)  | -1087(17) | -15553(16) | 1         | 18(3)             |
| C(9)  | -5770(60)  | -3010(20) | -15160(20) | 1         | 28(5)             |
| C(10) | -3430(60)  | -2920(20) | -16070(20) | 1         | 41(7)             |
| C(11) | -3390(70)  | -1720(20) | -16730(20) | 1         | 37(6)             |
| C(6)  | -10700(70) | -5480(20) | -12160(20) | 1         | 34(5)             |
| N(3)  | -7930(50)  | -4867(17) | -16815(17) | 1         | 21(4)             |
| C(16) | -10360(50) | -6110(20) | -15260(20) | 1         | 28(5)             |
| C(15) | -8450(60)  | -5820(20) | -16190(20) | 1         | 26(5)             |
| C(13) | -5570(60)  | -3590(20) | -18238(17) | 1         | 24(4)             |
| C(14) | -6080(60)  | -4690(16) | -17553(19) | 1         | 20(4)             |
| C(24) | -3310(70)  | -3370(20) | -19010(20) | 1         | 30(5)             |
| C(22) | -1960(50)  | -5380(20) | -18840(20) | 1         | 41(7)             |
| N(4)  | -4840(40)  | -6604(16) | -17262(16) | 1         | 22(4)             |
| Cl(1) | -10306(17) | -8603(6)  | -7628(6)   | 1         | 33(2)             |
| Cl(4) | -13575(19) | -10348(6) | -13663(6)  | 1         | 36(2)             |
| Cl(6) | -18274(14) | -11966(4) | -11288(4)  | 1         | 24(2)             |
| Cl(3) | -14665(12) | -10289(4) | -9332(4)   | 1         | 22(2)             |
| C(8)  | -8210(60)  | -4310(20) | -13650(20) | 1         | 33(6)             |
| C(21) | -4210(60)  | -5517(19) | -17839(18) | 1         | 23(4)             |
| C(19) | -7110(60)  | -7930(20) | -15760(20) | 1         | 42(6)             |
| C(23) | -1450(60)  | -4298(19) | -19377(19) | 1         | 38(6)             |
| C(18) | -9030(60)  | -8060(20) | -14900(20) | 1         | 38(6)             |
| C(17) | -10730(60) | -7048(19) | -14689(17) | 1         | 23(4)             |

## SUPPORTING INFORMATION

|       |           |           |            |   |       |
|-------|-----------|-----------|------------|---|-------|
| C(20) | -6390(50) | -6797(13) | -16476(18) | 1 | 21(4) |
|-------|-----------|-----------|------------|---|-------|

\* $U_{eq}$  is defined as one third of the trace of the orthogonalized  $U_{ij}$  tensor.

**Table S2.** Atomic coordinates ( $\times 10^4$ ) and equivalent isotropic displacement parameters ( $\text{\AA}^2 \times 10^3$ ) for  $(C_{12}H_9N_2)SbCl_4$  at 293(2) K with estimated standard deviations in parentheses.

| Label | x        | y        | z        | Occupancy | $U_{eq}^*$ |
|-------|----------|----------|----------|-----------|------------|
| Sb(1) | 10545(2) | 6298(1)  | 3676(1)  | 1         | 30(1)      |
| Sb(2) | -552(2)  | 5615(1)  | 1321(1)  | 1         | 30(1)      |
| Cl(7) | -1248(7) | 4295(4)  | 610(2)   | 1         | 54(2)      |
| Cl(6) | 3587(6)  | 5478(4)  | 1417(3)  | 1         | 56(2)      |
| Cl(5) | -461(8)  | 4740(4)  | 2560(2)  | 1         | 55(2)      |
| N(4)  | 3810(20) | 5804(10) | 9083(7)  | 1         | 37(3)      |
| N(1)  | 6250(20) | 6054(9)  | 5972(7)  | 1         | 32(3)      |
| C(7)  | 4490(30) | 8676(15) | 6225(10) | 1         | 66(5)      |
| C(22) | 6850(30) | 6213(15) | 8312(9)  | 1         | 43(5)      |
| N(3)  | 7470(20) | 5406(11) | 8234(7)  | 1         | 44(4)      |
| C(15) | 3010(30) | 4318(14) | 9274(9)  | 1         | 46(4)      |
| C(14) | 3620(30) | 3456(11) | 9186(9)  | 1         | 52(4)      |
| C(9)  | 6980(30) | 7604(14) | 5694(9)  | 1         | 45(5)      |
| C(5)  | 3890(30) | 7131(11) | 6442(9)  | 1         | 36(4)      |
| C(11) | 5080(30) | 5405(12) | 6241(8)  | 1         | 31(4)      |
| C(6)  | 3230(30) | 8063(14) | 6495(9)  | 1         | 51(5)      |
| C(10) | 5730(30) | 6943(13) | 5995(9)  | 1         | 36(4)      |
| C(17) | 4980(30) | 6465(12) | 8734(9)  | 1         | 37(4)      |
| C(18) | 4320(30) | 7373(9)  | 8828(9)  | 1         | 39(4)      |
| C(12) | 5610(30) | 4576(13) | 6165(10) | 1         | 51(5)      |
| C(16) | 4320(30) | 4982(11) | 8966(9)  | 1         | 32(4)      |
| C(23) | 6300(20) | 4760(12) | 8564(7)  | 1         | 32(4)      |
| Cl(1) | 10158(8) | 5421(4)  | 4955(2)  | 1         | 52(2)      |
| Cl(2) | 11300(6) | 7634(4)  | 4398(2)  | 1         | 51(2)      |
| Cl(4) | 10405(7) | 7178(4)  | 2419(2)  | 1         | 59(2)      |
| Cl(3) | 6421(7)  | 6421(5)  | 3583(3)  | 1         | 65(2)      |
| C(3)  | 1890(20) | 5035(11) | 7017(7)  | 1         | 36(3)      |
| C(2)  | 2520(30) | 4186(16) | 6907(11) | 1         | 59(5)      |
| C(1)  | 4290(30) | 3992(15) | 6495(11) | 1         | 60(5)      |
| N(2)  | 2610(20) | 6530(9)  | 6740(6)  | 1         | 32(3)      |
| C(4)  | 3210(20) | 5665(12) | 6664(7)  | 1         | 27(3)      |
| C(21) | 8040(20) | 6937(13) | 8021(9)  | 1         | 47(4)      |
| C(24) | 6770(30) | 3910(13) | 8449(10) | 1         | 44(4)      |



## SUPPORTING INFORMATION

|       |          |          |          |   |       |
|-------|----------|----------|----------|---|-------|
| C(19) | 5520(30) | 8039(13) | 8508(10) | 1 | 43(4) |
| C(13) | 5510(30) | 3257(12) | 8777(8)  | 1 | 52(4) |
| C(8)  | 6380(30) | 8423(15) | 5814(10) | 1 | 61(5) |
| C(20) | 7510(30) | 7783(14) | 8095(9)  | 1 | 42(4) |
| Cl(8) | -260(7)  | 6488(4)  | 24(2)    | 1 | 48(2) |

\* $U_{eq}$  is defined as one third of the trace of the orthogonalized  $U_{ij}$  tensor.

**Table S3.** Atomic coordinates ( $\times 10^4$ ) and equivalent isotropic displacement parameters ( $\text{\AA}^2 \times 10^3$ ) for  $(C_{12}H_9N_2)_2InBr_4 \cdot Br$  at 150.00 K with estimated standard deviations in parentheses.

| Label  | x        | y         | z       | Occupancy | $U_{eq}^*$ |
|--------|----------|-----------|---------|-----------|------------|
| In(01) | 1901(1)  | -2162(1)  | 6630(1) | 1         | 38(1)      |
| In(02) | 7148(1)  | 8054(1)   | 6682(1) | 1         | 40(1)      |
| Br(03) | 2087(1)  | -633(2)   | 4219(1) | 1         | 44(1)      |
| Br(04) | 8002(1)  | 10463(2)  | 4146(1) | 1         | 45(1)      |
| Br(05) | 2085(1)  | -1461(2)  | 5711(1) | 1         | 49(1)      |
| Br(06) | 7972(1)  | 8730(2)   | 7527(1) | 1         | 47(1)      |
| Br(07) | 7712(1)  | 9934(2)   | 5971(1) | 1         | 50(1)      |
| Br(08) | 7357(1)  | 4814(2)   | 6471(1) | 1         | 54(1)      |
| Br(09) | 2868(1)  | -4886(2)  | 6855(1) | 1         | 63(1)      |
| Br(0A) | 5363(1)  | 8598(2)   | 6725(1) | 1         | 62(1)      |
| Br(0B) | 2473(1)  | 250(2)    | 7229(1) | 1         | 64(1)      |
| Br(0C) | 143(1)   | -2721(2)  | 6719(1) | 1         | 64(1)      |
| C(00D) | 5947(8)  | 8283(12)  | 4898(4) | 1         | 41(2)      |
| N(00E) | 10023(5) | 12310(10) | 4445(3) | 1         | 35(2)      |
| N(00F) | 6084(5)  | 8145(9)   | 3990(3) | 1         | 34(2)      |
| N(00G) | 11763(5) | 14043(10) | 4661(3) | 1         | 34(2)      |
| N(00H) | 61(5)    | -2470(9)  | 3964(3) | 1         | 34(2)      |
| C(00I) | -151(7)  | -2807(14) | 4864(4) | 1         | 43(2)      |
| N(00J) | -1658(5) | -4235(10) | 3724(3) | 1         | 37(2)      |
| N(00K) | 5823(5)  | 3139(9)   | 4499(3) | 1         | 34(2)      |
| C(00L) | 10534(6) | 12899(11) | 4050(4) | 1         | 32(2)      |
| C(00M) | 11967(7) | 14400(12) | 3763(4) | 1         | 41(2)      |
| C00N() | -459(6)  | -3066(12) | 4352(4) | 1         | 35(2)      |
| C(00O) | 5994(7)  | 3045(12)  | 3597(4) | 1         | 39(2)      |
| C(00P) | -1354(6) | -3977(12) | 4211(4) | 1         | 35(2)      |
| C(00Q) | 4642(8)  | 1931(14)  | 3061(4) | 1         | 44(2)      |
| C(00R) | 4493(6)  | 1996(12)  | 3956(4) | 1         | 34(2)      |
| C(00S) | 11659(7) | 14105(14) | 3277(4) | 1         | 45(2)      |
| N(00T) | 4262(6)  | 6670(10)  | 3851(3) | 1         | 37(2)      |
| C(00U) | 4466(7)  | 7182(13)  | 5230(4) | 1         | 43(2)      |

## SUPPORTING INFORMATION

---

|        |          |           |         |   |       |
|--------|----------|-----------|---------|---|-------|
| C(00V) | 11008(7) | 13026(13) | 5943(4) | 1 | 44(2) |
| C(00W) | 4081(7)  | 6753(13)  | 4758(4) | 1 | 41(2) |
| C(00X) | 10771(8) | 13215(13) | 3166(4) | 1 | 45(2) |
| C(00Y) | 5597(8)  | 2631(13)  | 3129(5) | 1 | 47(3) |
| C(00Z) | 5392(8)  | 7948(14)  | 5303(4) | 1 | 44(2) |
| N(010) | 3987(5)  | 1712(9)   | 4380(3) | 1 | 36(2) |
| C(011) | 10209(7) | 12626(12) | 3539(4) | 1 | 37(2) |
| C(012) | 4630(6)  | 7083(12)  | 4323(4) | 1 | 35(2) |
| C(013) | 5571(6)  | 7842(11)  | 4407(4) | 1 | 34(2) |
| C(014) | -839(8)  | -3242(14) | 2456(5) | 1 | 48(3) |
| C(015) | 11546(7) | 13645(12) | 5560(4) | 1 | 40(2) |
| C(016) | -732(8)  | -3376(13) | 5234(4) | 1 | 46(3) |
| C(017) | 11436(7) | 13782(12) | 4175(4) | 1 | 37(2) |
| C(018) | 11225(7) | 13419(11) | 5041(4) | 1 | 36(2) |
| C(019) | 5923(8)  | 7629(14)  | 2609(4) | 1 | 45(2) |
| C(01A) | 6308(7)  | 8064(12)  | 3085(4) | 1 | 39(2) |
| C(01B) | -1112(7) | -3603(12) | 3356(4) | 1 | 39(2) |
| C(01C) | 4104(7)  | 1594(13)  | 3460(4) | 1 | 40(2) |
| C(01D) | 10332(7) | 12501(12) | 4938(4) | 1 | 35(2) |
| C(01E) | -1608(7) | -4292(14) | 5105(5) | 1 | 46(3) |
| C(01F) | 340(7)   | -2008(14) | 3070(4) | 1 | 43(2) |
| C(01G) | -222(7)  | -2666(12) | 3468(4) | 1 | 39(2) |
| C(01H) | 5439(6)  | 2755(13)  | 4032(4) | 1 | 39(2) |
| C(01I) | 10120(8) | 12104(14) | 5828(4) | 1 | 46(2) |
| C(01J) | 5749(6)  | 7747(11)  | 3516(4) | 1 | 33(2) |
| C(01K) | 5685(7)  | 3154(13)  | 5412(4) | 1 | 43(2) |
| C(01L) | 32(8)    | -2278(15) | 2577(5) | 1 | 52(3) |
| C(01M) | 5145(8)  | 2818(14)  | 5828(5) | 1 | 48(3) |
| C(01N) | 4793(7)  | 7009(12)  | 3451(4) | 1 | 37(2) |
| C(01O) | -1387(7) | -3859(13) | 2827(4) | 1 | 43(2) |
| C(01P) | 4973(8)  | 6941(15)  | 2540(4) | 1 | 47(3) |
| C(01Q) | -1913(7) | -4589(12) | 4612(4) | 1 | 38(2) |
| C(01R) | 9783(7)  | 11837(12) | 5339(4) | 1 | 41(2) |
| C(01S) | 4342(6)  | 2084(12)  | 4860(4) | 1 | 35(2) |
| C(01T) | 3799(7)  | 1728(13)  | 5286(4) | 1 | 41(2) |
| C(01U) | 5290(7)  | 2804(12)  | 4910(4) | 1 | 35(2) |
| C(01V) | 4197(8)  | 2123(14)  | 5755(4) | 1 | 46(2) |
| C(01W) | 4426(7)  | 6610(13)  | 2950(4) | 1 | 42(2) |

---

\* $U_{eq}$  is defined as one third of the trace of the orthogonalized  $U_{ij}$  tensor.

## SUPPORTING INFORMATION

**Table S4.** Under 2090 nm laser irradiation, the SHG intensity of  $(C_{12}H_9N_2)PbCl_3$ ,  $(C_{12}H_9N_2)SbCl_4$ , and  $(C_{12}H_9N_2)_2InBr_4 \cdot Br$  was compared with that of  $AgGaS_2$  at different particle sizes.

| Particle size   | $(C_{12}H_9N_2)PbCl_3/AgGaS_2$ | $(C_{12}H_9N_2)SbCl_4/AgGaS_2$ | $(C_{12}H_9N_2)_2InBr_4 \cdot Br/AgGaS_2$ |
|-----------------|--------------------------------|--------------------------------|-------------------------------------------|
| 75-100 $\mu m$  | 0.013                          | 0.014                          | 0.017                                     |
| 100-150 $\mu m$ | 0.015                          | 0.018                          | 0.030                                     |
| 150-200 $\mu m$ | 0.008                          | 0.011                          | 0.013                                     |
| 200-250 $\mu m$ | 0.043                          | 0.015                          | 0.015                                     |
| 250-355 $\mu m$ | 0.018                          | 0.006                          | 0.008                                     |
| 355-450 $\mu m$ | 0.032                          | 0.012                          | 0.009                                     |

**Table S5.** The Olex2 crystal structure refinement parameters for  $(C_{12}H_9N_2)PbCl_3$  were compared in two space groups,  $P1$  and  $P$ .

| Space group   | $P1$   | $P$   |
|---------------|--------|-------|
| $R_1$         | 2.11%  | 1.88% |
| $wR_2$        | 4.86%  | 5.84% |
| $d_{min}(Mo)$ | 0.79   | 0.79  |
| $I/\sigma$    | 32.7   | 50.5  |
| $R_{int}$     | 3.26%  | 3.50% |
| complete      | 99%    | 100%  |
| Shift         | -0.001 | 0.000 |
| Max peak      | 0.5    | 0.6   |
| Min peak      | -1.1   | -1.1  |
| Goof          | 1.055  | 1.211 |

**Table S6.** The Olex2 crystal structure refinement parameters for  $(C_{12}H_9N_2)SbCl_4$  were compared in two space groups,  $P2_1/c$  and  $P2_1$ .

| Space group   | $P2_1$ | $P2_1/c$ |
|---------------|--------|----------|
| $R_1$         | 2.78%  | 3.87%    |
| $wR_2$        | 6.02%  | 8.47%    |
| $d_{min}(Mo)$ | 0.72   | 0.72     |
| $I/\sigma$    | 20.1   | 15.3     |
| $R_{int}$     | 6.73%  | 5.96%    |
| complete      | 100%   | 99%      |
| Shift         | 0.001  | 0.000    |
| Max peak      | 0.5    | 0.6      |
| Min peak      | -0.7   | -1.0     |
| Goof          | 1.136  | 1.011    |

## SUPPORTING INFORMATION

**Table S7.** The comparison of the unit cell parameters of  $(C_{12}H_9N_2)_2InBr_4 \cdot Br$  at high and low temperatures.

| Empirical formula    | $(C_{12}H_9N_2)_2InBr_4 \cdot Br$ |                         |
|----------------------|-----------------------------------|-------------------------|
| Temperature          | 433.00 K                          | 150.00 K                |
| Crystal system       | Monoclinic                        | Monoclinic              |
|                      | $a = 13.72 \text{ \AA}$           | $a = 13.86 \text{ \AA}$ |
|                      | $b = 7.74 \text{ \AA}$            | $b = 7.76 \text{ \AA}$  |
| Unit cell dimensions | $c = 26.43 \text{ \AA}$           | $c = 26.18 \text{ \AA}$ |
|                      | $\alpha = 90^\circ$               | $\alpha = 90^\circ$     |
|                      | $\beta = 90^\circ$                | $\beta = 90^\circ$      |
|                      | $\gamma = 90^\circ$               | $\gamma = 90^\circ$     |
| Volume               | $2805 \text{ \AA}^3$              | $2704 \text{ \AA}^3$    |
